# Supplementary material for: A fully bio-based wood adhesive valorising hemicellulose-rich sidestreams from the pulp industry
Source: Royal Society of Chemistry journal article supplement (doi:10.1039/d0gc04273k), 2021-01-01
Supplement: d0gc04273k1.pdf [file d0gc04273k1.pdf]

# A fully bio-based wood adhesive valorising hemicellulose-rich sidestreams from the pulp industry

Tijana Todorovic<sup>a</sup>, Emelie Norström<sup>a</sup>, Farideh Khabbaz<sup>a</sup>, Jörg Brücher<sup>c</sup>, Eva Malmström<sup>a,b</sup>, Linda Fogelström<sup>a,b\*</sup>

KTH Royal Institute of Technology, School of Engineering Sciences in Chemistry, Biotechnology and Health, Department of Fibre and Polymer Technology, <sup>a</sup>Division of Coating Technology,

<sup>b</sup>Wallenberg Wood Science Center, Teknikringen 56-58, SE-100 44 Stockholm, Sweden

<sup>c</sup>Holmen Development, SE-89180 Örnsköldsvik, Sweden

\* Corresponding author, E-mail: lindafo@kth.se, Tel: +46 8 790 97 58

## Supplementary material

Table S1. Formulations of the adhesives prepared with hemicelluloses and PVAm to accomplish 20 wt% dry content.

| Sample     |       | Components (g)                |            |                               |            |              |                                 |            | pH  |             |
|------------|-------|-------------------------------|------------|-------------------------------|------------|--------------|---------------------------------|------------|-----|-------------|
| Components | Ratio | HW (49 % in H <sub>2</sub> O) |            | SW (40 % in H <sub>2</sub> O) |            | Xyl (solid)  | PVAm (20 % in H <sub>2</sub> O) |            |     | Added water |
|            |       | Added amount                  | Dry amount | Added amount                  | Dry amount | Added amount | Added amount                    | Dry amount |     |             |
| PVAm       |       |                               |            |                               |            |              | 4.0                             | 0.8        | 0.0 | 9.2         |
| Xyl        |       |                               |            |                               |            | 0.8          |                                 |            | 3.2 | 4.8         |
| Xyl : PVAm | 3 : 1 |                               |            |                               |            | 0.6          | 1.0                             | 0.2        | 2.4 | 7.8         |
|            | 1 : 1 |                               |            |                               |            | 0.4          | 2.0                             | 0.4        | 1.6 | 8.7         |
|            | 1 : 3 |                               |            |                               |            | 0.2          | 3.0                             | 0.6        | 0.8 | 9.1         |
| HW         |       | 1.6                           | 0.8        |                               |            |              |                                 |            | 2.4 | 6.4         |
| HW : PVAm  | 3 : 1 | 1.2                           | 0.6        |                               |            |              | 1.0                             | 0.2        | 1.8 | 7.8         |
|            | 1 : 1 | 0.8                           | 0.4        |                               |            |              | 2.0                             | 0.4        | 1.2 | 7.6         |
|            | 1 : 3 | 0.4                           | 0.2        |                               |            |              | 3.0                             | 0.6        | 0.6 | 8.7         |
| SW         |       |                               |            | 2.0                           | 0.8        |              |                                 |            | 2.0 | 6.2         |
| SW : PVAm  | 3 : 1 |                               |            | 1.5                           | 0.6        |              | 1.0                             | 0.2        | 1.5 | 8.1         |
|            | 1 : 1 |                               |            | 1.0                           | 0.4        |              | 2.0                             | 0.4        | 1.0 | 8.1         |
|            | 1 : 3 |                               |            | 0.5                           | 0.2        |              | 3.0                             | 0.6        | 0.5 | 8.8         |

Table S2. Formulations of the adhesives prepared with hemicelluloses and chitosan to accomplish 20 wt% dry content.

| Sample     |       | Components (g)                |            |                               |            |              |                     |                               | pH  |
|------------|-------|-------------------------------|------------|-------------------------------|------------|--------------|---------------------|-------------------------------|-----|
| Components | Ratio | HW (49 % in H <sub>2</sub> O) |            | SW (40 % in H <sub>2</sub> O) |            | Xyl (solid)  | CS (in acetic acid) |                               |     |
|            |       | Added amount                  | Dry amount | Added amount                  | Dry amount | Added amount | CS solid amount     | Acetic acid (10 wt% in water) |     |
| CS         |       |                               |            |                               |            |              | 0.8                 | 3.2                           | 4.0 |
| Xyl        |       |                               |            |                               |            | 0.8          |                     |                               | 4.8 |
| Xyl : CS   | 3 : 1 |                               |            |                               |            | 0.6          | 0.2                 | 3.2                           | 4.5 |
|            | 1 : 1 |                               |            |                               |            | 0.4          | 0.4                 | 3.2                           | 4.7 |
|            | 1 : 3 |                               |            |                               |            | 0.2          | 0.6                 | 3.2                           | 6.0 |
| HW         |       | 1.6                           | 0.8        |                               |            |              |                     |                               | 6.4 |
| HW : CS    | 3 : 1 | 1.2                           | 0.6        |                               |            |              | 0.2                 | 2.6                           | 4.0 |
|            | 1 : 1 | 0.8                           | 0.4        |                               |            |              | 0.4                 | 2.8                           | 4.1 |
|            | 1 : 3 | 0.4                           | 0.2        |                               |            |              | 0.6                 | 3.0                           | 4.3 |
| SW         |       |                               |            | 2.0                           | 0.8        |              |                     |                               | 6.2 |
| SW : CS    | 3 : 1 |                               |            | 1.5                           | 0.6        |              | 0.2                 | 2.3                           | 3.6 |
|            | 1 : 1 |                               |            | 1.0                           | 0.4        |              | 0.4                 | 2.6                           | 3.8 |
|            | 1 : 3 |                               |            | 0.5                           | 0.2        |              | 0.6                 | 2.9                           | 4.0 |

Table S3. Carbohydrate composition, including the main saccharides, of hardwood hydrolysate (HW) and softwood ultrafiltrate (SW).

|           | Hardwood hydrolysate<br>[%] | Softwood ultrafiltrate<br>[%] |
|-----------|-----------------------------|-------------------------------|
| Arabinose | 0.9                         | 2.0                           |
| Galactose | 6.4                         | 11.4                          |
| Glucose   | 8.1                         | 19.3                          |
| Xylose    | 78.5                        | 0.3                           |
| Mannose   | 6.1                         | 67.0                          |

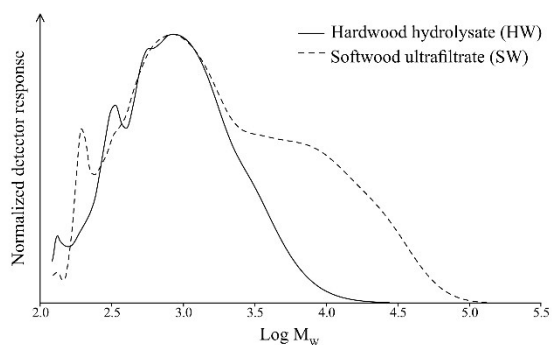

Figure S1. Chromatograms of molecular weight distributions of lignin in the hardwood hydrolysate (HW) and softwood ultrafiltrate (SW).

Table S4. Molecular weights of lignin in the hardwood hydrolysate (HW) and softwood ultrafiltrate (SW).

|                        | $M_n$ [g/mol] | $M_w$ [g/mol] | $\bar{D}$ |
|------------------------|---------------|---------------|-----------|
| Hardwood hydrolysate   | 450           | 1 000         | 2.5       |
| Softwood ultrafiltrate | 570           | 4 000         | 7.0       |

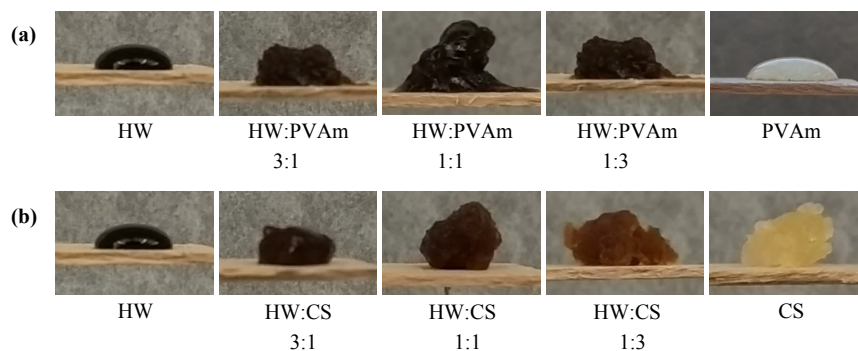

Figure S2. Dispersions containing (a) hardwood hydrolysate (HW) and poly(vinyl amine) (PVAm), and (b) hardwood hydrolysate (HW) and chitosan (CS).

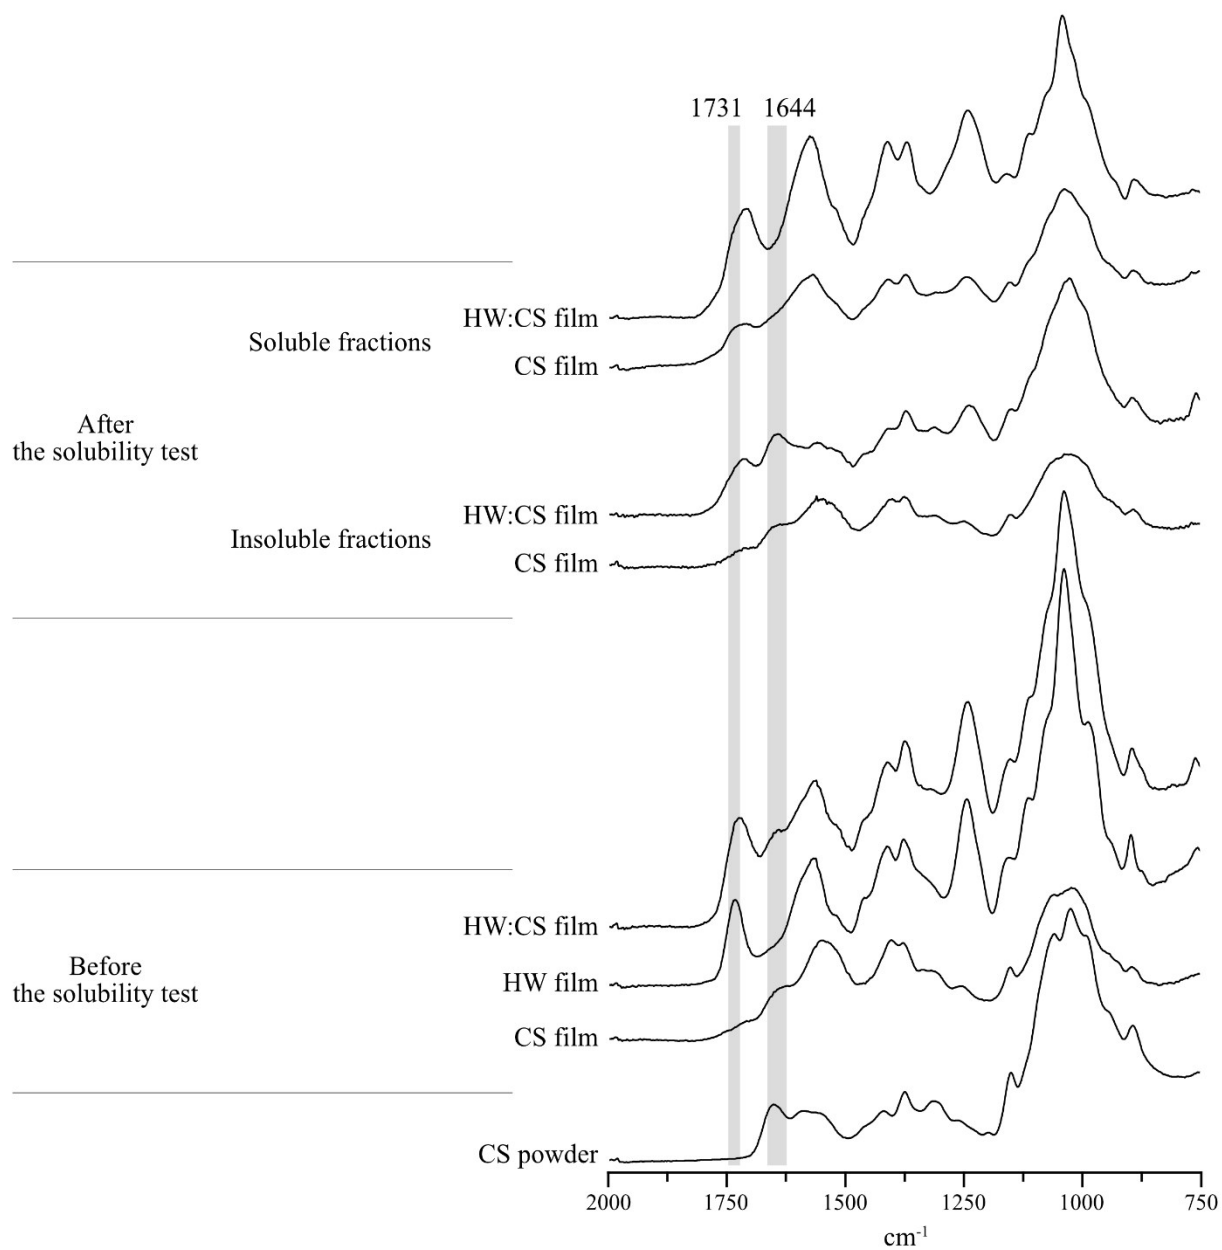

Figure S3. FTIR spectra of hardwood hydrolysate (HW), chitosan (CS), and HW:CS ratio 3:1, before and after the solubility tests.
